# Supplementary material for: Axial variation of deoxyhemoglobin density as a source of the low-frequency time lag structure in blood oxygenation level-dependent signals
Source: PubMed Central journal article supplement (PMC6756514; doi:10.1371/journal.pone.0222787), 2019-09-23

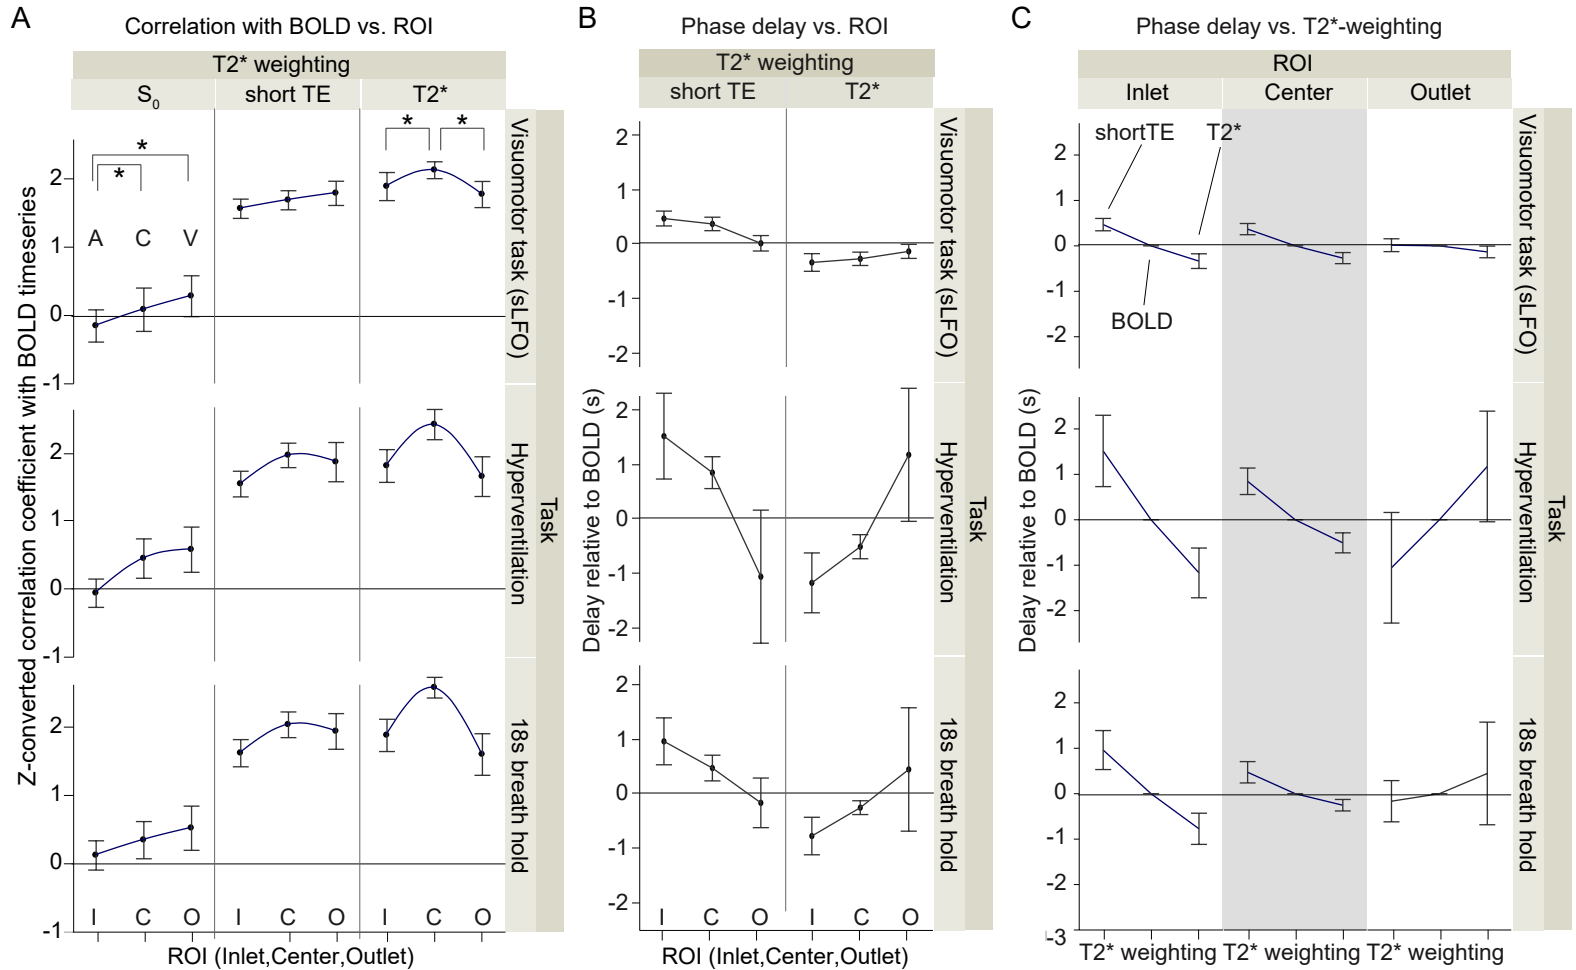

Supplement: pone.0222787.s001.pdf [file pone.0222787.s001.pdf]
