# Supplementary material for: Axial variation of deoxyhemoglobin density as a source of the low-frequency time lag structure in blood oxygenation level-dependent signals
Source: PubMed Central journal article supplement (PMC6756514; doi:10.1371/journal.pone.0222787), 2019-09-23

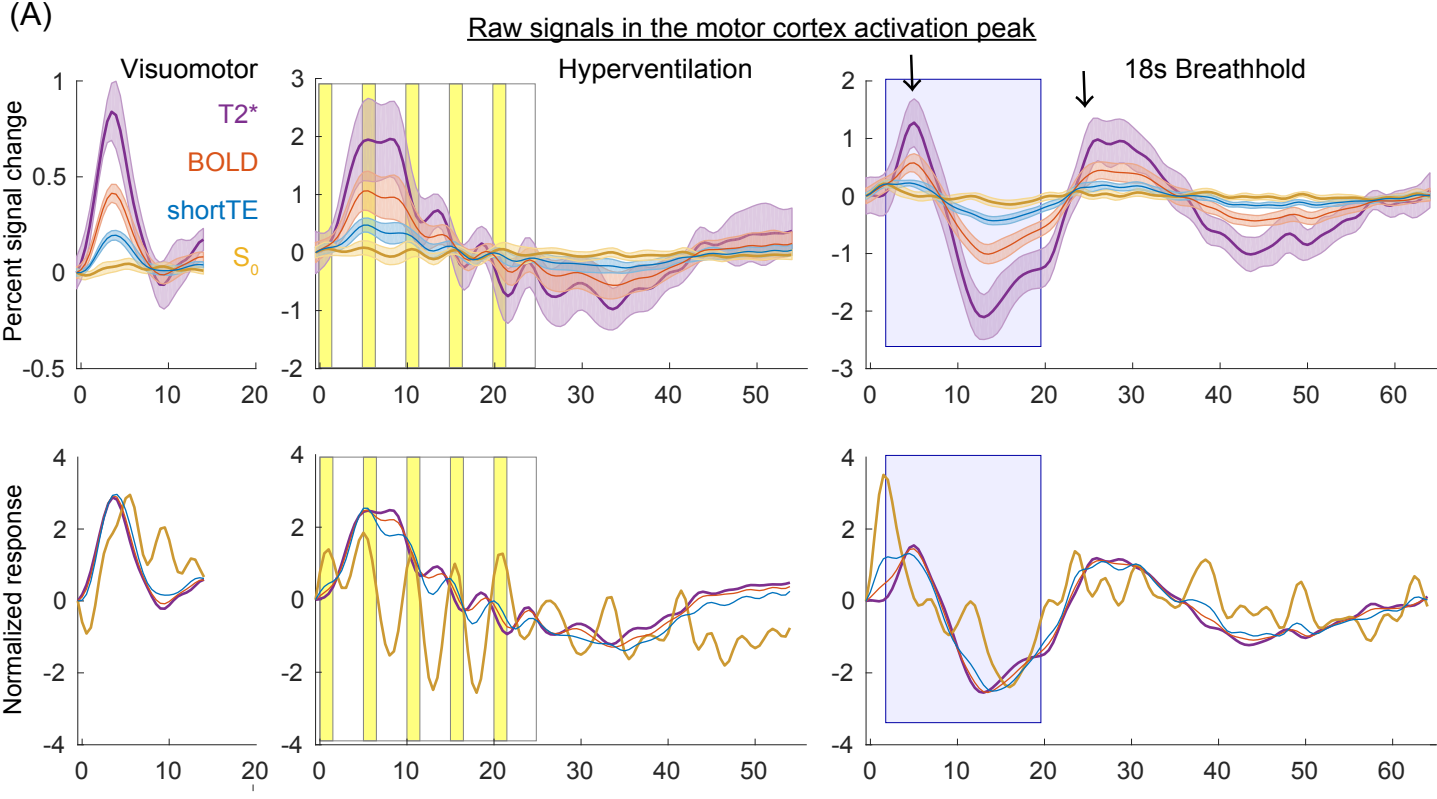

**(B)** Respiration-related fast S<sub>0</sub> change during HV   $p < 0.001$ , uncorrected

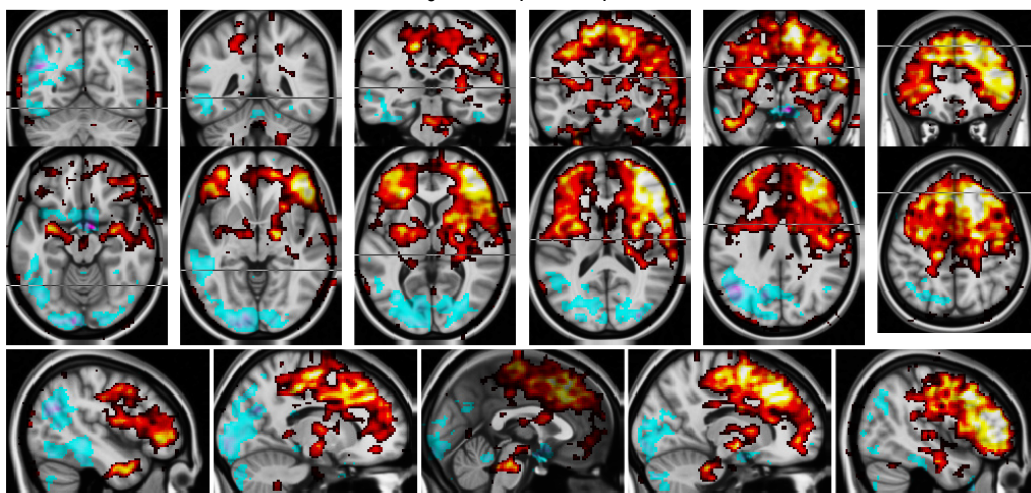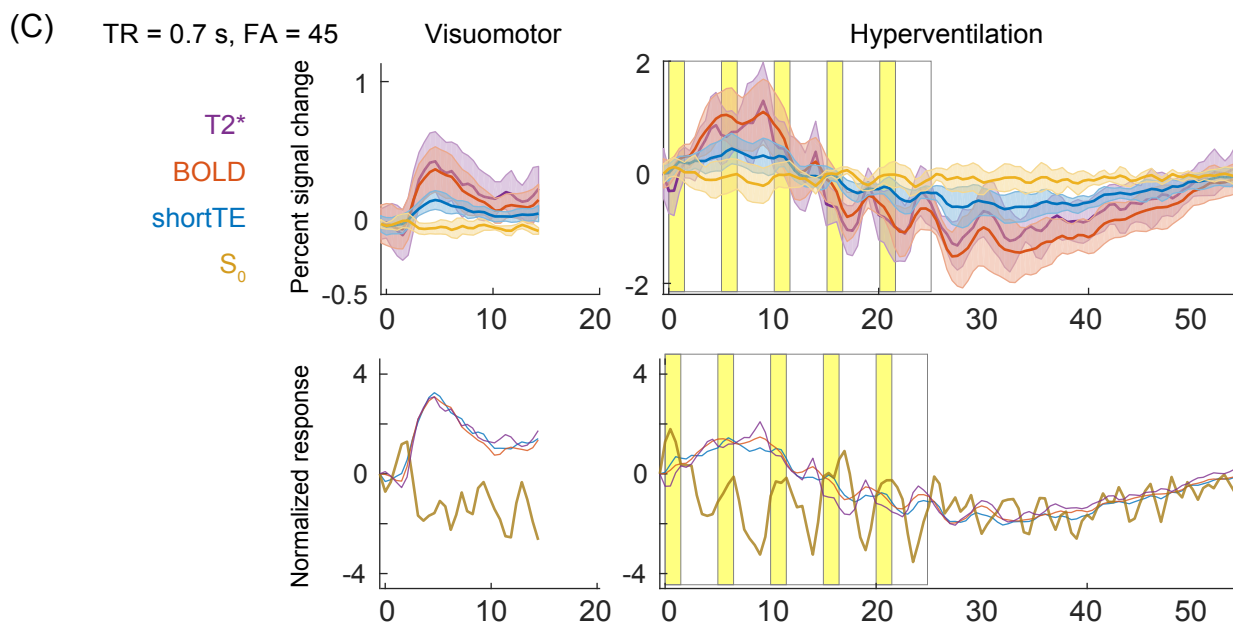

Supplement: pone.0222787.s002.pdf [file pone.0222787.s002.pdf]
